# Supplementary material
Source: PubMed Central journal article supplement (PMC3394694)

Online Table 1. mtDNA sequence data of 17 primate species online

| <u>Species name</u>          | <u>GenBank accession number</u> |
|------------------------------|---------------------------------|
| Homo sapiens                 | NC_011137                       |
| <i>Cebus albifron</i>        | NC_002763                       |
| <i>Gorilla gorilla</i>       | NC_011120                       |
| <i>Hylobates lar</i>         | NC_002082                       |
| <i>Lemur catta</i>           | NC_004025                       |
| <i>Macaca mulatta</i>        | NC_005943                       |
| <i>Macaca sylvanus</i>       | NC_002764                       |
| <i>Nycticebus coucang</i>    | NC_002765                       |
| <i>Pan paniscus</i>          | NC_001644                       |
| <i>Pan troglodytes</i>       | NC_001643                       |
| <i>Papio hamadryas</i>       | NC_001992                       |
| <i>Pongo pygmaeus</i>        | NC_001646                       |
| <i>Pongo pygmaeus abelii</i> | NC_002083                       |
| <i>Tarsius bancanus</i>      | NC_002811                       |
| <i>Mus musculus</i>          | NC_006914.1                     |
| <i>Bos taurus</i>            | HM045018.1                      |
| <i>Xenopus laevis</i>        | NC_001573.1                     |

Online Table 2 mtDNA mutations in three Chinese families with Leber's hereditary optic neuropathy.

| Gene       | Position    | Replacement   | CRS <sup>a</sup> | WZ510    | WZ511    | WZ512    | AA change      | AA Position | Conservation (H/B/M/X) | Previously reported <sup>b</sup> |
|------------|-------------|---------------|------------------|----------|----------|----------|----------------|-------------|------------------------|----------------------------------|
| D-loop     | 73          | A to G        | A                | G        | G        | G        |                |             |                        | Yes                              |
|            | 152         | T to C        | T                | C        |          |          |                |             |                        | Yes                              |
|            | 228         | G to T        | G                | T        |          |          |                |             |                        | Yes                              |
|            | 263         | A to G        | A                | G        | G        | G        |                |             |                        | Yes                              |
|            | 310         | T to CTC/TC   | T                | CTC      | TC       | TC       |                |             |                        | Yes                              |
|            | 489         | T to C        | T                | C        | C        | C        |                |             |                        | Yes                              |
|            | 16066       | A to G        | A                |          |          | G        |                |             |                        | Yes                              |
|            | 16093       | T to C        | T                | C        | C        |          |                |             |                        | Yes                              |
|            | 16129       | G to A        | G                | A        | A        |          |                |             |                        | Yes                              |
|            | 16223       | C to T        | C                | T        | T        | T        |                |             |                        | Yes                              |
|            | 16249       | T to C        | T                | C        |          |          |                |             |                        | Yes                              |
|            | 16311       | T to C        | T                |          | C        | C        |                |             |                        | Yes                              |
|            | 16362       | T to C        | T                | C        |          |          |                |             |                        | Yes                              |
| 12S rRNA   | 709         | G to A        | G                |          | A        | A        |                |             | G/A/A/-                | Yes                              |
|            | 750         | A to G        | A                | G        | G        | G        |                |             | A/A/A/-                | Yes                              |
|            | 1438        | A to G        | A                | G        | G        | G        |                |             | A/A/A/G                | Yes                              |
| 16S rRNA   | 2706        | A to G        | A                | G        | G        | G        |                |             | A/G/A/A                | Yes                              |
|            | 3010        | G to A        | G                | A        |          |          |                |             | G/G/A/A                | Yes                              |
|            | 3168        |               |                  |          |          | Ins C    |                |             |                        | No                               |
|            | 3206        | C to T        | C                | T        |          |          |                |             | C/A/T/A                | Yes                              |
| <i>ND1</i> | 3483        | G to A        | G                | A        |          |          |                |             |                        | Yes                              |
|            | <b>3866</b> | <b>T to C</b> | <b>T</b>         | <b>C</b> | <b>C</b> | <b>C</b> | <b>Ile-Thr</b> | <b>187</b>  | <b>I/I/I</b>           | <b>Yes</b>                       |
|            | 4035        | A to G        | A                |          |          | G        |                |             |                        | No                               |
| <i>ND2</i> | 4140        | C to T        | C                |          | T        | T        |                |             |                        | Yes                              |
|            | 4769        | A to G        | A                | G        | G        | G        |                |             |                        | Yes                              |
|            | 4883        | C to T        | C                | T        |          |          |                |             |                        | Yes                              |
|            | 5178        | C to A        | C                | A        |          |          | Leu-Met        | 237         | L/T/T/T                | Yes                              |
|            | 5466        | A to G        | A                | G        |          |          | Thr-Ala        | 333         | T/S/S/S                | Yes                              |
| <i>COI</i> | 6357        | C to T        | C                |          | T        |          |                |             |                        | Yes                              |

|             |       |        |   |   |   |   |         |     |         |           |
|-------------|-------|--------|---|---|---|---|---------|-----|---------|-----------|
|             | 6915  | G to A | G |   |   | A | Val-Met | 338 | V/M/M/M | No        |
|             | 7028  | C to T | C | T | T | T |         |     |         | Yes       |
|             | 7250  | A to G | A |   |   | G |         |     |         | Yes       |
|             | 7295  | A to C | A | C |   |   |         |     |         | No        |
| <i>ATP8</i> | 8414  | C to T | C | T |   |   | Leu-Phe | 17  | L/F/M/W | Yes       |
|             | 8473  | T to C | T | C |   |   |         |     |         | Yes       |
| <i>ATP6</i> | 8701  | A to G | A | G | G | G | Thr-Ala | 59  | T/S/L/Q | Yes       |
|             | 8793  | T to C | T |   | C | C |         |     |         | Yes       |
|             | 8821  | T to C | T |   | G |   | Ser-Ala | 99  | S/S/S/S | Yes       |
|             | 8856  | G to A | G |   | A | A |         |     |         | Yes       |
|             | 8860  | A to G | A | G | G | G | Thr-Ala | 112 | T/A/A/T | Yes       |
| <i>CO3</i>  | 9540  | T to C | T | C | C | C |         |     |         | Yes       |
|             | 9966  | G to A | G |   | A |   | Val-Ile | 254 | V/V/V/V | Yes       |
| <i>ND3</i>  | 10197 | G to A | G | A |   |   | Ala-Thr | 47  | A/A/A/M | Yes       |
|             | 10398 | A to G | A | G | G | G | Thr-Ala | 114 | T/T/T/A | Yes       |
|             | 10400 | C to T | C | T | T | T |         |     |         | Yes       |
| <i>ND4L</i> | 10646 | G to A | G |   | A | A |         |     |         | Yes       |
| <i>ND4</i>  | 10873 | T to C | T | C | C | C |         |     |         | Yes       |
|             | 11257 | C to T | C |   | T |   |         |     |         | Yes       |
|             | 11719 | G to A | G | A | A | A |         |     |         | Yes       |
| <i>ND5</i>  | 12549 | C to T | C |   | T | T |         |     |         | Yes       |
|             | 12705 | C to T | C | T | T | T |         |     |         | Yes       |
|             | 13135 | G to A | G |   | A |   | Ala-Thr | 267 | A/T/T/M | Yes       |
|             | 13152 | A to G | A |   | G | G |         |     |         | Yes       |
|             | 13401 | T to C | T | C |   |   |         |     |         | Yes       |
|             | 13561 | C to A | C |   |   | A | Leu-Met | 409 | I/I/I   | <b>No</b> |
| <i>ND6</i>  | 14502 | T to C | T |   | C | C | Ile-Val | 58  | I/I/I   | Yes       |
|             | 14668 | C to T | C | T |   |   |         |     |         | Yes       |
| <i>Cytb</i> | 14766 | C to T | C | T | T | T | Thr-Ile | 7   | T/S/T/S | Yes       |
|             | 14783 | T to C | T | C | C | C |         |     |         | Yes       |
|             | 14979 | T to C | T | C |   |   | Ile-Thr | 78  | I/I/L/L | Yes       |
|             | 15040 | C to T | C |   | T |   |         |     |         | Yes       |
|             | 15043 | G to A | G | A | A |   |         |     |         | Yes       |

|       |        |   |   |   |   |         |     |         |     |
|-------|--------|---|---|---|---|---------|-----|---------|-----|
| 15071 | T to C | T |   | C |   | Tyr-His | 109 | Y/F/F/Y | Yes |
| 15218 | A to G | A |   | G | G | Thr-Ala | 158 | T/T/T/N | Yes |
| 15301 | G to A | G | A | A | A |         |     |         | Yes |
| 15326 | A to G | A | G | G | G | Thr-Ala | 194 | T/M/I/I | Yes |
| 15412 | T to C | T | C |   |   |         |     |         | Yes |

---

<sup>a</sup>Conservation of amino acid for polypeptides or nucleotide for RNAs in homo sapiens (H), bovine (B), mouse (M) and *Xenopus laevis* (X).

<sup>b</sup>See the online mitochondrial genome database <http://www.mitomap.org> and <http://www.genpat.uu.se/mtDB>

Supplemental Figure 1

I187T

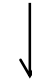

|                       |                                                                                                                      |
|-----------------------|----------------------------------------------------------------------------------------------------------------------|
| Homo sapiens          | STLITTTQ <del>E</del> HLWLLLPSWPLAMMWFISTLAETNRTPPFDLAE <del>G</del> ESELVSGF                                        |
| Gorilla gorilla       | STLIMTQ <del>E</del> HLWLLLPTWPLAMMWFISTLAETNRTPPFDLAE <del>G</del> ESELVSGF                                         |
| Cebus albifrons       | QSLITTTQ <del>E</del> QSWLLLPSWPLTMMWFISTLAETNRAPFDL <del>T</del> E <del>G</del> ESELVSGF                            |
| Hylobates lar         | STLITTTQ <del>E</del> HIWLLLPTWPLAMMWFISTLAETNRTPPFDL <del>T</del> E <del>G</del> ESELVSGF                           |
| Lemur catta           | STLITTTQ <del>E</del> YLWLIIPSWPLAMMWFISTLAETNRAPFDL <del>T</del> E <del>G</del> ESELVSGF                            |
| Macaca mulatta        | N <del>T</del> LITTTQ <del>E</del> HLWLLLPSWPLAMMWF <del>T</del> STLAETNRTPPFDL <del>M</del> E <del>G</del> ESELVSGF |
| Macaca sylvanus       | N <del>T</del> LITTTQ <del>E</del> HLWLLLPSWPLAMMWF <del>T</del> STLAETNRTPPFDL <del>M</del> E <del>G</del> ESELVSGF |
| Nycticebus coucang    | STLIKTQ <del>E</del> HTWLLLPSWPLAMMWFISTLAETNRAPFDL <del>T</del> E <del>G</del> ESELVSGF                             |
| Pan paniscus          | STLITTTQ <del>E</del> HLWLILPTWPLAMMWFISTLAETNRTPPFDL <del>T</del> E <del>G</del> ESELVSGF                           |
| Pan troglodytes       | STLVTTQ <del>E</del> HLWLILPTWPLAMMWFISTLAETNRTPPFDL <del>T</del> E <del>G</del> ESELVSGF                            |
| Papio hamadryas       | N <del>M</del> LITTTQ <del>E</del> HLWLILPSWPLAMMWF <del>T</del> STLAETNRTPPFDL <del>M</del> E <del>G</del> ESELVSGF |
| Pongo pygmaeus abelii | SALITTTQ <del>E</del> HSWLLLPSWPLALMWFISTLAETNRAPFDL <del>T</del> E <del>G</del> ESELVSGF                            |
| Pongo pygmaeus        | STLITPQ <del>E</del> NSWLLLPSWPLALMWFISTLAETNRAPFDL <del>T</del> E <del>G</del> ESELVSGF                             |
| Tarsius bancanus      | TKLIMTQ <del>E</del> YSWLIAPSWPLAMMWF <del>T</del> STLAETNRAPFDL <del>T</del> E <del>G</del> ESELVSGF                |
| Bos taurus            | STLITTTQ <del>E</del> QMWLILPAWPLAMMWFISTLAETNRAPFDL <del>T</del> E <del>G</del> ESELVSGF                            |
| Mus musculus          | QTLITTTQ <del>E</del> HMWLLLPAWPMAMMWFISTLAETNRAPFDL <del>T</del> E <del>G</del> ESELVSGF                            |
| Xenopus laevis        | TTLMTTQ <del>E</del> QMWLIIPGWPMAMWYISTLAETNRAPFDL <del>T</del> E <del>G</del> ESELVSGF                              |

## Supplemental Figure 2

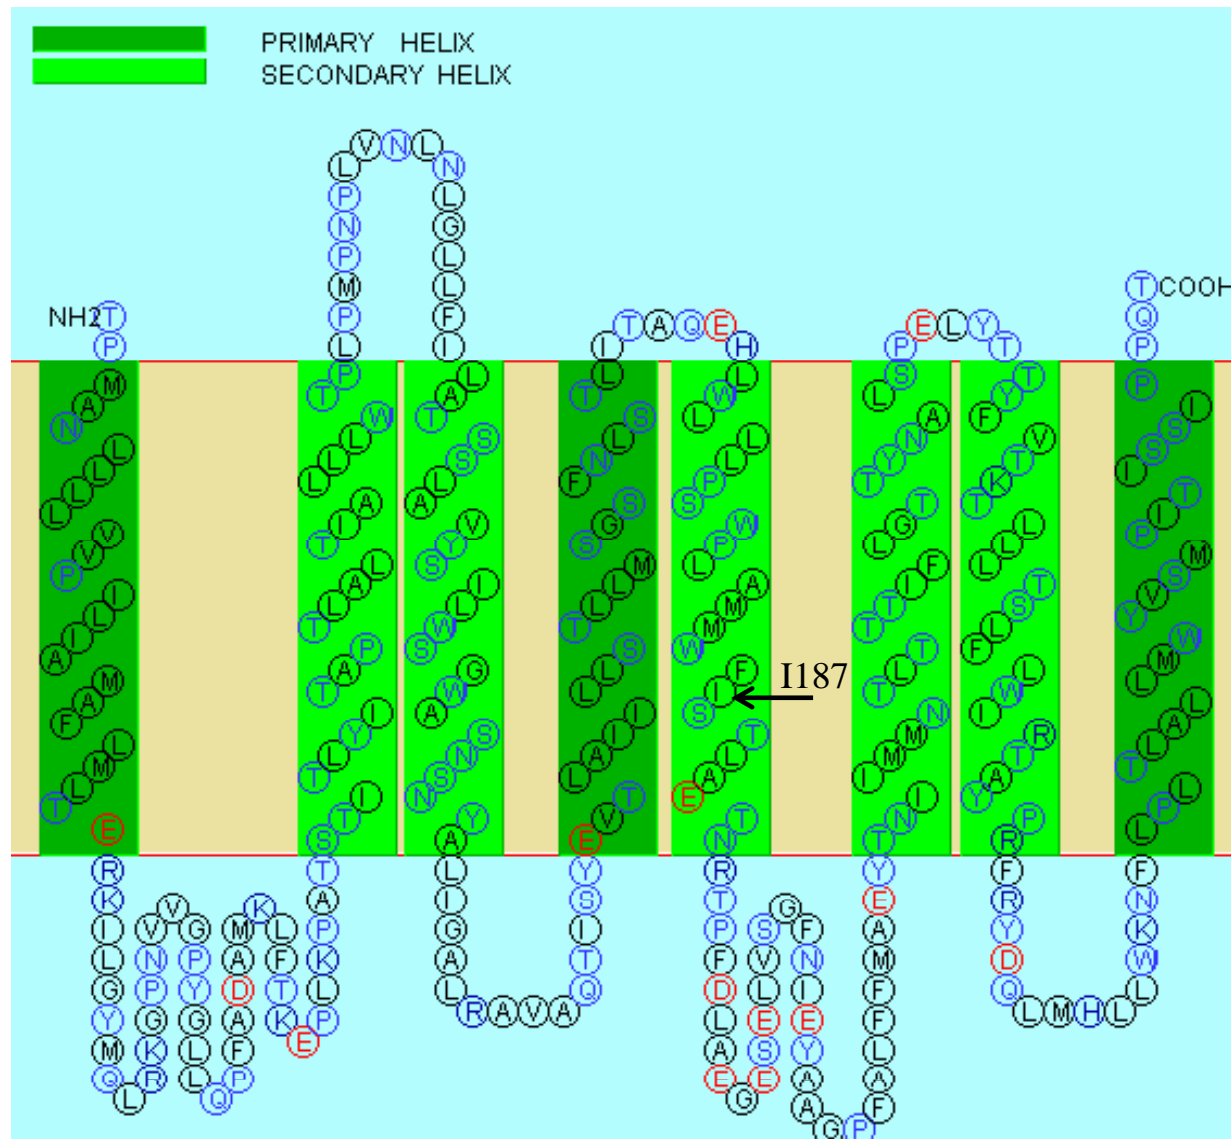

Supplement: supp_11-9109_IOVS-11-9109-s01.pdf [file supp_11-9109_IOVS-11-9109-s01.pdf]
